# Supplementary material for: Revealing the reinforcing effect of a nanorod network on a polymer matrix through molecular dynamics simulations
Source: Royal Society of Chemistry journal article supplement (doi:10.1039/d3cp01437a), 2023-01-01
Supplement: d3cp01437a1.pdf [file d3cp01437a1.pdf]

**Supporting information for**  
**Revealing the reinforcing effect of a nanorod network on a polymer matrix**  
**through molecular dynamics simulations**

Xiu Li<sup>a</sup>, Ben Huang<sup>a</sup>, Jun Liu<sup>b\*</sup>, Xiaoxi Hu<sup>c</sup>, and Zi-Jian Zheng<sup>a\*</sup>

<sup>a</sup>Ministry of Education Key Laboratory for the Green Preparation and Application of Functional Materials, Hubei Key Laboratory of Polymer Materials, Hubei University, Wuhan 430062, China

<sup>b</sup>Key Laboratory of Beijing City on Preparation and Processing of Novel Polymer Materials, Beijing University of Chemical Technology, Beijing, 100029, China

<sup>c</sup>College of Mechanical Engineering, Guangdong Songshan Polytechnic, Shaoguan, Guangdong, 512126, China

\*To whom correspondence should be addressed: Z. J. Zheng, zhengzj@hubu.edu.cn; J. Liu: liujun@mail.buct.edu.cn.

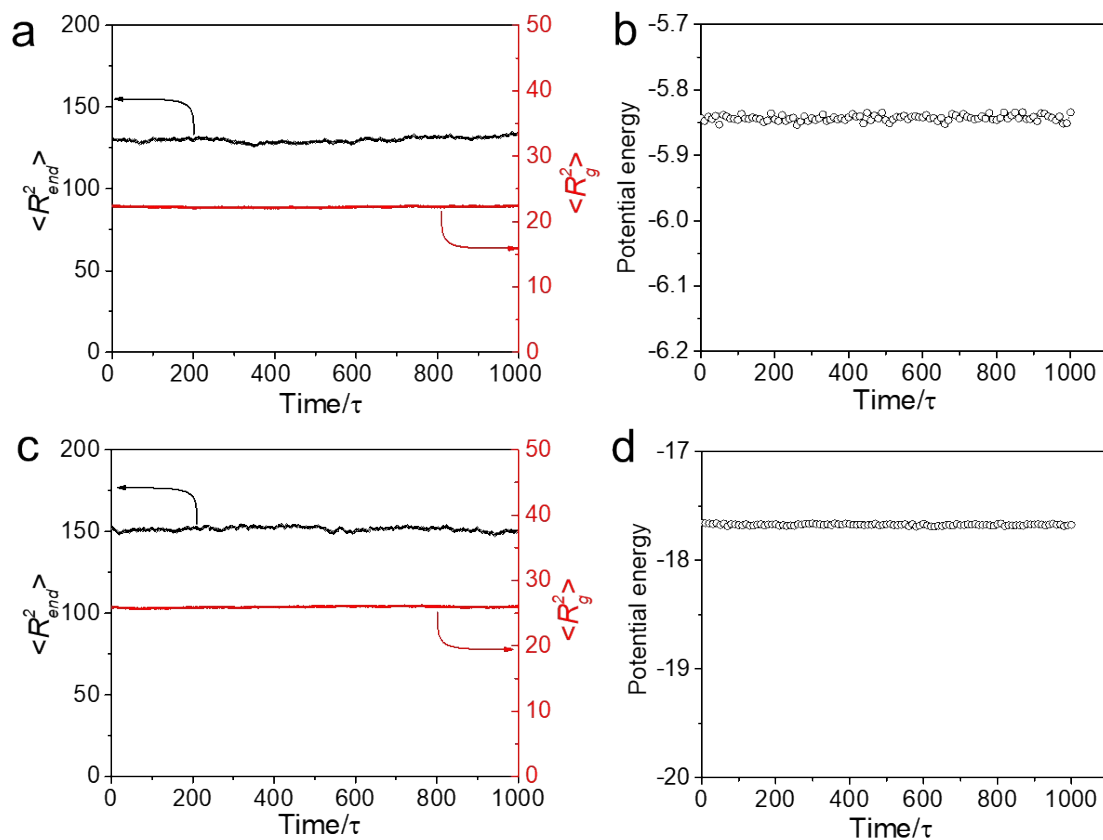

Fig. S1 (a, c) The variation of the mean squared end-to-end distance  $R2_{end}$ , radius of gyration  $R2_g$  and (b, d) the change of the potential energy of the two systems in the following  $1.0 \times 10^6$  MD steps after enough equilibration with  $NVT$  ensemble. For a and b, the NP-polymer interaction strength  $\epsilon_{np}$  equals 2.0, NP-NP interaction strength  $\epsilon_{nn}$  equals 1.0, and  $r_{cutoff}$  equals 2.5. For c and d, the NP-polymer interaction strength  $\epsilon_{np}$  equals 2.0, NP-NP interaction strength  $\epsilon_{nn}$  equals 50.0, and  $r_{cutoff}$  equals 2.5.

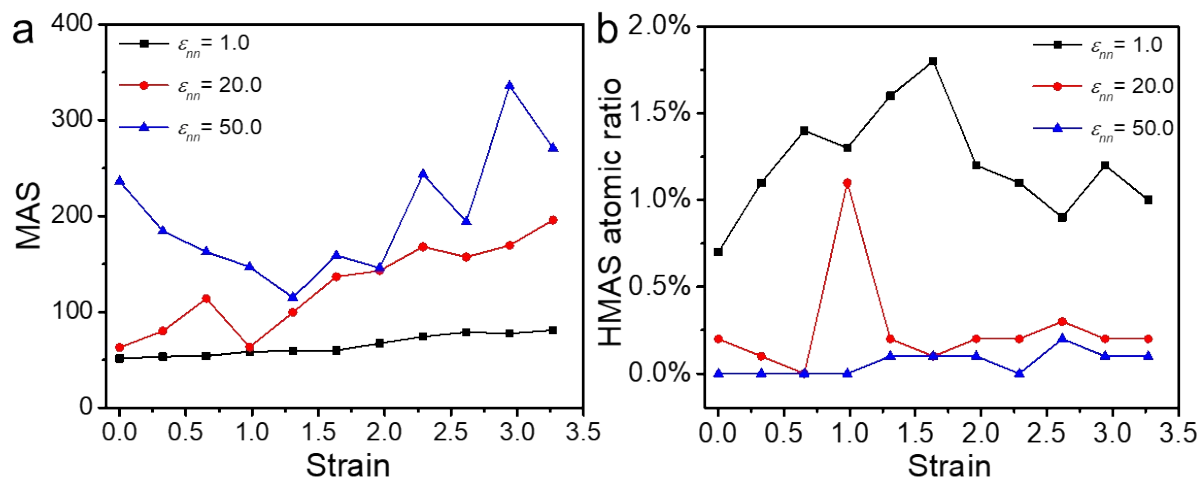

Fig. S2 (a) Maximum atomic stress (MAX) imposed on the polymer atoms for simulated systems with different NR-NR interaction strengths. (b) Density of polymer atoms with HMAS for simulated systems with different NR-NR interaction strengths.
